# Supplementary material
Source: PubMed Central journal article supplement (PMC7112141)
Supplement: supp_RA120000627_158216_1_supp_469140_q54vnt.pdf [file supp_RA120000627_158216_1_supp_469140_q54vnt.pdf]

Supplementary Materials  
Supplementary Table I, Supplementary Figures 1-4

| Gene    | ID             | Primer 1               | Primer 2                    | Probe                     | Amplicon Length |
|---------|----------------|------------------------|-----------------------------|---------------------------|-----------------|
| ORMDL1  | NM_001134704.2 | GGCCTGCTTCACATTGTATTT  | TATTCTTGCTGGTGAGGTCG        | AGTGTTCCCTGTTGCCTGGACCTT  | 115             |
| ORMDL2  | NM_001105940.1 | CTCCTCAGCATCCCTTTCTTC  | ACATACAGTCAAAGGGACGC        | AGCATTCCCTGTTGTCTGGACCTG  | 103             |
| ORMDL3  | NM_001047897.1 | ACTGGGAGCAGATGGACTAT   | CTACACCAAGTATGACCAAGTC<br>C | TGTGCTGTACTTCCCTCACCAGCTT | 114             |
| SPTLC1  | NM_001108406.1 | GAACCATCCTGCTCTCAACTA  | TAATTTCTCGGGTTGCTGG         | ACCCATAACATCGTGGTGAACGGA  | 113             |
| SPTLC2  | NM_001037097.1 | TGGTGCCTTTGATGCTCTAC   | TGTAGTTGTGGTGGGATTTCC       | CGCCTTTGGGAGAGAGATGCTGAA  | 94              |
| SPTLC3  | NM_001106517.1 | CTAATGGGACTCTACGCAATCC | AATAGGAAGGCAGAGGAGGA        | TGGAATCTCGAAAAGCCCAGCA    | 112             |
| ssSPTa  | NM_001047743.1 | GAAGCAGATGTCCTGGTTCTAC | CAATTCGATGCTGGTTTCTGTG      | TTGCTGGTCACTGCGCTCTACAT   | 103             |
| UGT8    | NM_019276.3    | GCAGAGGGCTCAGAAGTTATC  | ACTACATTCTTCGCCACGAC        | TTCATAAGGATCAACCCGGCCACC  | 97              |
| GAL3ST1 | NM_001109447.1 | CATCAGTGGTTTCCTGAGATGA | CCTATTGCTGCTGTACTCCTATG     | TACTGCCGAAGAAGCCCTGCAA    | 115             |
| MBP     | NM_001025291.1 | CCTGTCCCTCAGCAGATTTAG  | CTATAAATCGGCTCACAAGGGA      | CAGAAGCCAGGATTTGGCTACGGA  | 97              |
| MOG     | NM_022668.2    | GCCGTGGAGTTGAAAGTAGAA  | TTGTATTCTCTTCTGCAGC         | TCTCATTGCCCTTGTGCCTATGCT  | 124             |
| PLP1    | NM_030990.2    | GTTCCAGAGCCAACATCAA    | CTATGCCCTGACTGTTGTATGG      | TCATTCTTTGGAGCGGGTGTGCA   | 116             |

Supplementary Table I. Real-time probes used

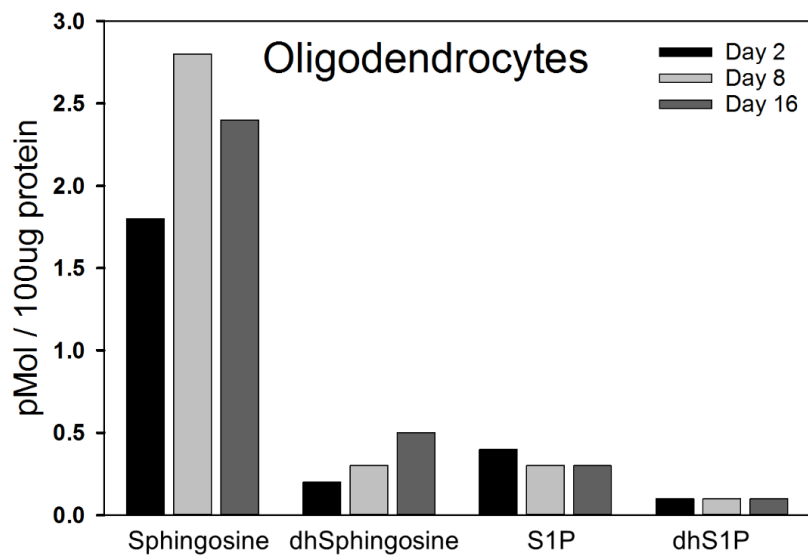

**Supplementary Figure 1. Levels of long chain bases do not substantially change during oligodendrocyte differentiation.** Oligodendrocytes were isolated from rat pups at day 2, 8, and 16 after birth as described in Methods, lipids were extracted and analyzed by mass spectroscopy. Shown are oligodendrocytes pooled from 20 rat pups per day.

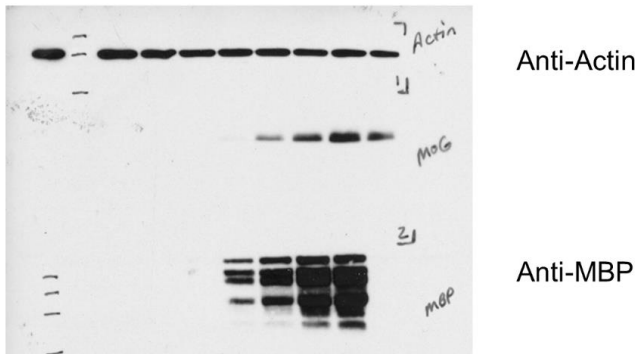

Figure 1. Actin and MBP

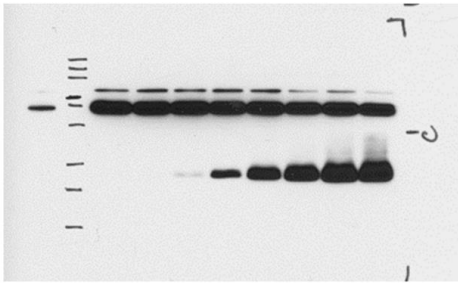

Figure 1. Actin and MOG

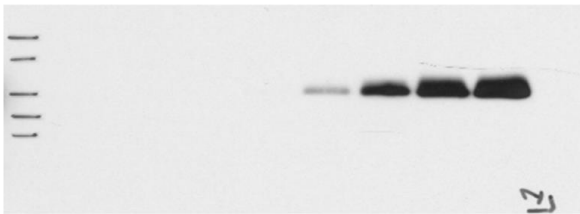

Figure 1. PLP

**Supplementary Figure 2. Raw Western images for proteins depicted in Figure 1.**

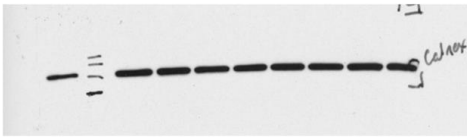

Figure 5. Calnexin

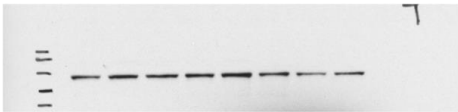

Figure 5. SPTLC1

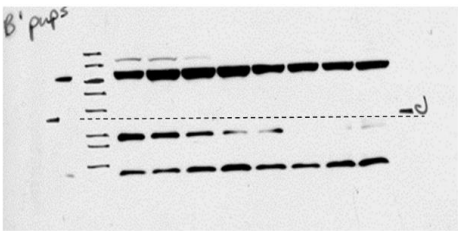

Anti-SPTLC3  
 ← Blot cut and separated  
 Anti-ORMDL

Figure 5. SPTLC3 and ORMDL

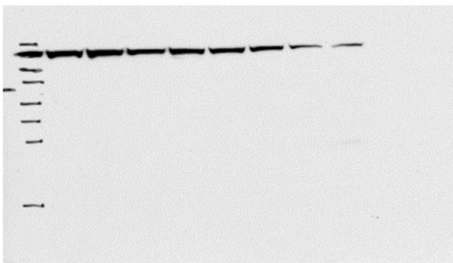

Figure 5. SPTLC2

**Supplementary Figure 3. Raw Western images for proteins depicted in Figure 5.**

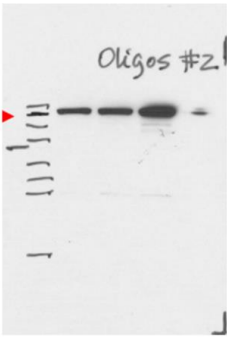

Figure 8. SPTLC1

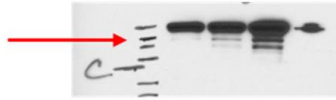

Figure 8. SPTLC2

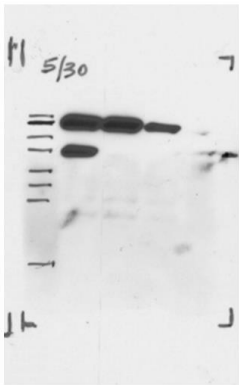

Figure 8. SPTLC3

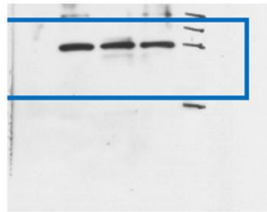

Figure 8. ORMDL

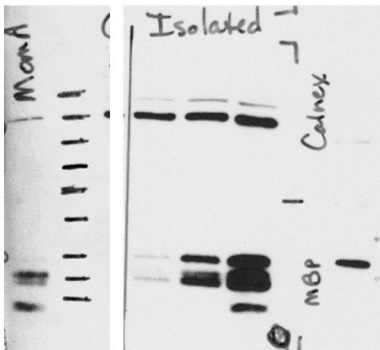

← Blot cut and separated

Figure 8. Calnexin and MBP

**Supplementary Figure 4. Raw Western images for proteins depicted in Figure 8.**
